# Supplementary material
Source: Copernicus journal article supplement (doi:10.5194/egusphere-2026-1772)
Supplement: Supplementary file 1 [file egusphere-2026-1772-supplement.pdf]

*Supporting Information for*

## **Antagonism or synergy: Divergent surface water dynamics at the southern margin of the Eurasian permafrost**

Bo Zhang<sup>1</sup>, Tiantian Liao<sup>1</sup>, Haitian Lu<sup>2</sup>, Jianuo Li<sup>1</sup>, Ziyang Huang<sup>1</sup>, Jiuhui Li<sup>1\*</sup>, Meng Guo<sup>1\*</sup>

<sup>1</sup>Key Laboratory of Geographical Processes and Ecological Security of Changbai Mountains, Ministry of Education, School of Geographical Sciences, Northeast Normal University, Changchun, 130024, China

<sup>2</sup>School of Architecture and Urban Planning, Chongqing University, Chongqing, 400045, China

*Correspondence to:* Jiuhui Li (lijh801@nenu.edu.cn) and Meng Guo (guom521@nenu.edu.cn)

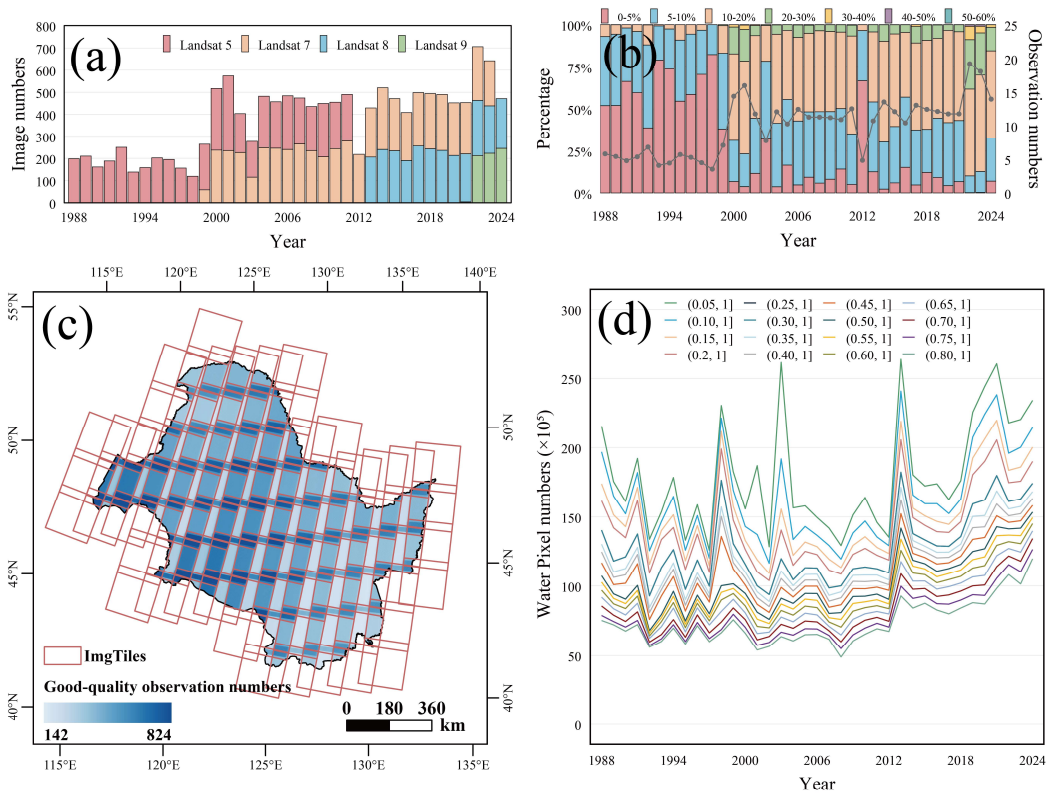

Figure S1. Analysis of Landsat image availability in the SHRZ from 1988 to 2024. (a) The number of high-quality Landsat images; (b) The quantitative distribution and annual mean of high-quality pixel observation counts and their proportion; (c) The spatial distribution of multi-year mean high-quality pixel observation counts; (d) The quantitative distribution of pixels across different water frequency ranges. (The standard administrative division data of China is from the National Platform for Common Geospatial Information Services, map approval number:

GS (2024) 0650).

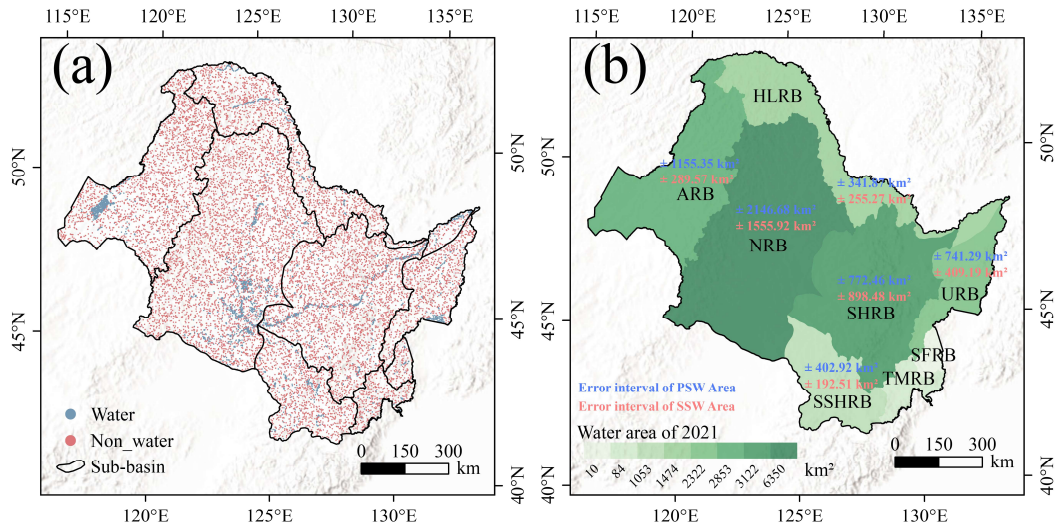

Figure S2. Surface water sampling design and validation results in 2021. (a) Stratified sampling design; (b) Validation results from the area estimation adjustment error method. Following the national water resources zones classification, the SHRZ comprises eight secondary river basins: Nen river basin (NRB), Songhua river basin (SHRB), Argun river basin (ARB), Heilong river basin (HLRB), Second Songhua river basin (SSHRB), Ussuri river basin (URB), Tumen river basin (TMRB), and Suifen river basin (SFRB).

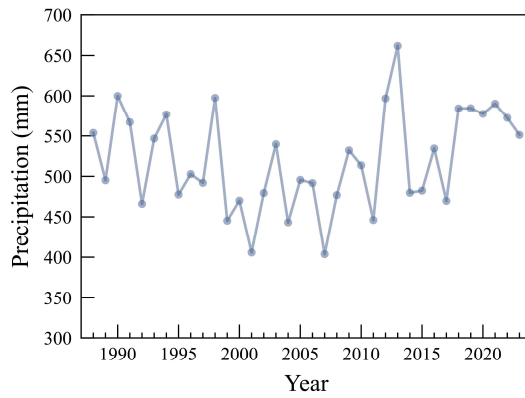

Figure S3. Mean annual precipitation in the SHRZ from 1988 to 2024.

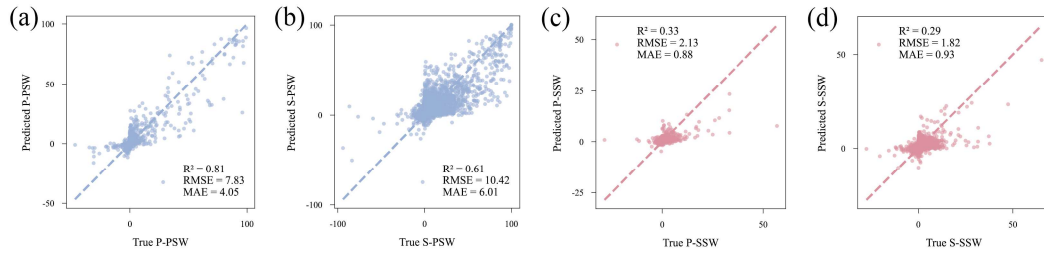

Figure S4. Model performance evaluation. (a–d) Scatter plots comparing predicted versus observed values for P-PSW, S-PSW, P-SSW, and S-SSW, with accuracy metrics embedded, the dashed line indicates the 1:1 relationship.

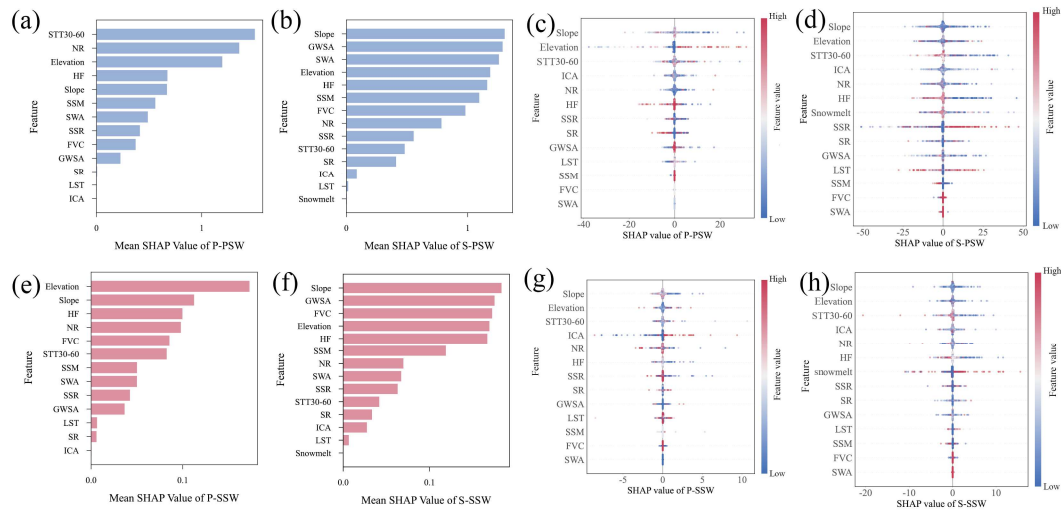

Figure S5. Global SHAP attribution analysis for PSW and SSW. (a–b) Global importance rankings based on mean absolute SHAP values for PSW in the permafrost and seasonal frozen ground regions, respectively; (c–d) SHAP summary plots illustrating the distribution and direction of feature impacts for PSW in the corresponding regions; (e–f) Global SHAP importance rankings for SSW in the permafrost and seasonally frozen ground regions; (g–h) SHAP summary plots illustrating the distribution of feature impacts for SSW in the corresponding regions. ‘P-’ presents the permafrost region, ‘S-’ presents the seasonal frozen ground region.

Table S1 Stratified random sample point design in the SHRZ.

| Samples                 | HL     | ARB    | SHRB   | NRB    | URB   | SSH   | SFRB  | TMRB  | Total  |
|-------------------------|--------|--------|--------|--------|-------|-------|-------|-------|--------|
|                         | RB     |        |        |        |       | RB    |       |       |        |
| Water                   | 386    | 509    | 615    | 946    | 194   | 242   | 34    | 74    | 3000   |
| Non-water               | 1546   | 2035   | 2460   | 3784   | 774   | 968   | 136   | 297   | 12000  |
| Total samples           | 1932   | 2544   | 3075   | 4730   | 968   | 1210  | 170   | 371   | 15000  |
| Area (km <sup>2</sup> ) | 119065 | 156776 | 189530 | 291474 | 59659 | 74562 | 10452 | 22881 | 924403 |

Table S2 Confusion matrix for accuracy assessment of original method in the SHRZ in 2021.

| Samples             | Ground verification |           | Total | User's accuracy          |
|---------------------|---------------------|-----------|-------|--------------------------|
|                     | Water               | Non-water |       |                          |
| Water               | 2075                | 925       | 3000  | 69.17%                   |
| Non-water           | 583                 | 11417     | 12000 | 95.14%                   |
| Producer's accuracy | 21.33%              | 99.39%    | /     | Overall accuracy =94.66% |

Table S3 Confusion matrix for accuracy assessment of IOWDM-ENC in the SHRZ in 2021.

| Samples             | Ground verification |           | Total | User's accuracy          |
|---------------------|---------------------|-----------|-------|--------------------------|
|                     | Water               | Non-water |       |                          |
| Water               | 2859                | 141       | 3000  | 95.3%                    |
| Non-water           | 108                 | 11916     | 12000 | 99.1%                    |
| Producer's accuracy | 66.89%              | 99.91%    | /     | Overall accuracy =99.03% |

Table S4 Confusion matrix for accuracy assessment of JRC-GSW in the SHRZ in 2021.

| Samples             | Ground verification |           | Total | User's accuracy          |
|---------------------|---------------------|-----------|-------|--------------------------|
|                     | Water               | Non-water |       |                          |
| Water               | 2542                | 458       | 3000  | 84.73%                   |
| Non-water           | 163                 | 11837     | 12000 | 98.64%                   |
| Producer's accuracy | 54.29%              | 99.71%    | /     | Overall accuracy =98.38% |

Table S5 Changes in surface water frequency in the SHRZ from 1988 to 2024.

|                         | Significant<br>reduction | No-significant<br>reduction | Significant<br>increase | No-significant<br>increase | SUM     |
|-------------------------|--------------------------|-----------------------------|-------------------------|----------------------------|---------|
| Area (km <sup>2</sup> ) | 792.09                   | 479.59                      | 3644.78                 | 1049.39                    | 5965.85 |
| Percent (%)             | 13.28%                   | 8.04%                       | 61.09%                  | 17.59%                     | 100%    |

Table S6 Changes in surface water frequency between permafrost and Seasonal frozen ground regions from 1988 to 2024.

| Permafrost type        | Significant<br>reduction | No-significant<br>reduction | Significant<br>increase | No-significant<br>increase | Overall<br>significant trend |
|------------------------|--------------------------|-----------------------------|-------------------------|----------------------------|------------------------------|
| Permafrost             | 5.00%                    | 5.24%                       | 13.53%                  | 6.08%                      | 8.53%                        |
| Seasonal frozen ground | 4.93%                    | 2.35%                       | 25.37%                  | 6.68%                      | 20.44%                       |
